# Supplementary material
Source: publisher site journal article supplement (https://www.dovepress.com/get_supplementary_file.php?f=240488.docx)
Supplement: Supplementary file 1 [file get_supplementary_file.php]

**APPENDIX A**

**Organ and Tissue Donation Competency Based Medical Education Program for Ontario Critical Care Medicine Residents**

**Hospital Donation Physician Survey Instrument**

**Introduction & Background**

The project is aimed at developing a comprehensive competency based medical education program for organ and tissue donation in Ontario. This education program, targeting adult and pediatric critical care residents aims to address Trillium Gift of Life (TGLN) institutional goals of enhancing organ and tissue donation-transplantation best practices. As part of our need’s assessment, we will be collecting data from key stakeholders in the organ and tissue donation-transplantation process. As such, this survey seeks to obtain the critical perspectives of the Hospital Donation Physicians (HDPs).

This survey will ask you about various aspects of the HDP role within your hospital. The survey should take approximately 20-25 minutes to complete.

If you would like further information on the Organ and Tissue Donation Competency Based Medical Education Program for Ontario Critical Care Medicine Residents, please contact Dr. Aimee Sarti at [asarti@toh.ca](mailto:asarti@toh.ca)

**Part A: Demographic Questions**

1. What is your base specialty?

2. How long have you been practicing?

- < 5 years
- 5-10 years
- >10 years

3. How long have you been at this hospital?

4. Please indicate the setting of your hospital:

- Academic
- Community

**Part B: Roles & Responsibilities of the HDP**

Prior to the implementation of the HDP program, who was typically responsible for the primary donation process (i.e., identification, assessment, family discussion, overseeing donor management)?

When was the HDP program implemented at your hospital?

Why was the HDP program implemented? That is, what problem were you trying to fix?

How long have you been in the HDP role?

How were you recruited for this role?

At your hospital, who do you report to?

What is your primary role (re: HDP position)?

Is the HDP involved with the pediatric population?

- No If no, who is responsible for the pediatric population?
- Yes

Do you have formal links with bereavement/end of life/palliative care?

- No If no, please select from below:
- Yes

Service not available at this hospital

Other: _______________________

Do you have an Organ and Tissue Donation Coordinator (OTCD) your hospital?

- No If no, please select what type of coordinator you have:
- Yes

OTDC on call

Local part-time coordinator

Hospital development coordinator

Other? __________________

**Part C: Education & Training**

Do HDPs receive special training for your position?

- No
- Yes If yes, please provide details of your training.

Is there a continuing medical education program for HDPs?

- No
- Yes If yes, who provides the education?

TGLN

Hospital

Other? ____________________

Are there education needs that you would like addressed?

- No
- Yes If yes, please list.

Do you supervise critical care fellows?

- No
- Yes

In your opinion, what are the three most important areas that critical care fellows need to become experts in with respect to organ and tissue donation?

1. _____________

2. _____________

3. _____________

From your experience, are critical care fellows well prepared to care for patients and their families with respect to organ and tissue donation at the end of their training?

- No If no, please list specific learning needs that should be addressed?
- Yes

**Part D: Social Networking**

We are interested in learning more about the potential social network among HDPs and RMLs. Please identify people on whom you rely the most at work specifically with respect to organ and tissue donation. These can be people who provide you with information, assistance, advice, support, or other resources. The people you identify can vary in terms of how frequently you interact with them.

**Contact Name:**

Please enter the first and last name of your contact. All HDPs and RMLs have been entered into our database. Suggested matches will appear as you type.

**Contact Frequency:**

Indicate the typical frequency with which you interact directly with each contact.

**Years Known:**

Enter the number of years you have known each contact.

**Contact Name Contact Frequency Years Known**

**John Doe**

**Daily**

**>5**

Contact Name (*Programming instructions only - name generator drop down options*)

- All 5 RML names & all 52 HDP names

Frequency (drop down options)

- Daily
- Weekly
- Bi-weekly
- Monthly

Years known (drop down options)

- < 5 years
- 6-10 years
- > 10 years

Is there an electronic forum for communication with other HDPs?

- No
- Yes

How often do you meet with your Regional Medical Lead (RML?)

- Daily
- Weekly
- Monthly
- Yearly
- Never

If you need support/collaborative dialogue regarding your role, to whom do you seek out first?

- Another physician at my hospital
- Another HDP at a different hospital
- My Regional Medical Lead (RML)
- Another RML
- Trillium Gift of Life personnel (other than RML & HDP)
- Someone else? ______________________

Do you feel you have sufficient time to collaborate with the OTDC at your hospital?

- No If no, please describe why?
- Yes

**Part E: Performance Measures**

Is your HDP program measured in terms of success criteria?

- No
- Yes

Are there performance measures attached to the HDP role?

- No
- Yes If yes, please list.

What changes (if any) have you seen as a result of your HDP program?

**Part H: Next Steps**

Have there been any unanticipated problems or successes of your HDP program?

- No
- Yes If yes, please describe.

Has there been significant modifications to the HDP role since implementing it at your hospital?

- No
- Yes If yes, please list.

Are you considering any modifications to your program in the future?

- No
- Yes If yes, please describe.

What would you do differently if starting the program again?

**THANK YOU FOR YOUR TIME AND THOUGHTFUL COMMENTS**
